# Supplementary material for: LC-MS analysis ofMyrica rubraextract and its hypotensive effectsviathe inhibition of GLUT 1 and activation of the NO/Akt/eNOS signaling pathway
Source: Royal Society of Chemistry journal article supplement (doi:10.1039/c9ra05895h), 2020-01-01
Supplement: c9ra05895h1.pdf [file c9ra05895h1.pdf]

## Supplementary Information

### **Myrica rubra ameliorated hypertension via inhabiting GLUT 1 and activating NO/Akt/eNOS signalling pathway**

Jing Lia#, Huiling Wanga#, Jian Lia, Yonggang Liua, Hong Ding\*

<sup>1</sup>Key Laboratory of Combinatorial Biosynthesis and Drug Discovery, Ministry of Education, Wuhan University School of Pharmaceutical Sciences, Wuhan, 430071, China

<sup>2</sup>Department of cell biology, Harvard Medical School. Boston, MA 02115, USA.

\*Correspondence and requests for materials should be addressed to (Tel: +8613007162084; E-mail: dinghong1106@whu.edu.cn) or S.Y.Y. (Tel: +18572254274; email: shanye\_yin@hms.harvard.edu)

Fig. S1. Chemical structures of main components identified in the extract of *Myrica rubra*.

1. R<sub>1</sub>=O-arabinopyranoside R<sub>2</sub>=R<sub>4</sub>=R<sub>5</sub>=R<sub>6</sub>=OH R<sub>3</sub>=R<sub>7</sub>=H
2. R<sub>1</sub>=O-gal R<sub>2</sub>=R<sub>4</sub>=R<sub>5</sub>=R<sub>6</sub>=OH R<sub>3</sub>=R<sub>7</sub>=H
3. R<sub>1</sub>=O-glu-(6)-rha R<sub>2</sub>=R<sub>4</sub>=R<sub>5</sub>=R<sub>6</sub>=OH R<sub>3</sub>=R<sub>7</sub>=H
4. R<sub>1</sub>=R<sub>2</sub>=R<sub>4</sub>=R<sub>5</sub>=R<sub>6</sub>=OH R<sub>3</sub>=R<sub>7</sub>=H

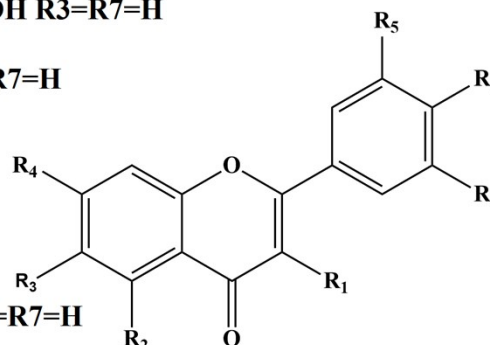

5. R<sub>1</sub>=O-glu-(2,6)-rha R<sub>2</sub>=R<sub>4</sub>=R<sub>5</sub>=R<sub>6</sub>=OH R<sub>3</sub>=R<sub>7</sub>=H
6. R<sub>2</sub>=O-gal R<sub>1</sub>=R<sub>4</sub>=R<sub>5</sub>=R<sub>6</sub>=OH R<sub>3</sub>=R<sub>7</sub>=H
7. R<sub>1</sub>=O-glu R<sub>2</sub>=R<sub>4</sub>=R<sub>5</sub>=R<sub>6</sub>=OH R<sub>3</sub>=R<sub>7</sub>=H
8. R<sub>1</sub>=O-glucuronide R<sub>2</sub>=R<sub>4</sub>=R<sub>5</sub>=R<sub>6</sub>=OH R<sub>3</sub>=R<sub>7</sub>=H
9. R<sub>1</sub>=O-rha-(6)-glu R<sub>2</sub>=R<sub>4</sub>=R<sub>5</sub>=R<sub>6</sub>=OH R<sub>3</sub>=R<sub>7</sub>=H
10. R<sub>1</sub>=O-rha-(2)-glu R<sub>2</sub>=R<sub>4</sub>=R<sub>5</sub>=R<sub>6</sub>=OH R<sub>3</sub>=R<sub>7</sub>=H

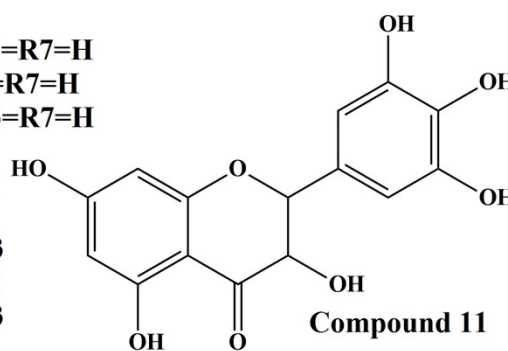

12. R<sub>3</sub>=H R<sub>1</sub>=R<sub>2</sub>=R<sub>4</sub>=R<sub>5</sub>=R<sub>6</sub>=R<sub>7</sub>=OH
13. R<sub>1</sub>=O-gal R<sub>2</sub>=R<sub>4</sub>=R<sub>5</sub>=R<sub>7</sub>=OH R<sub>3</sub>=R<sub>6</sub>=H
14. R<sub>1</sub>=R<sub>2</sub>=R<sub>4</sub>=R<sub>5</sub>=R<sub>7</sub>=OH R<sub>3</sub>=R<sub>6</sub>=H
15. R<sub>1</sub>=R<sub>2</sub>=R<sub>4</sub>=R<sub>6</sub>=OH R<sub>3</sub>=R<sub>7</sub>=H R<sub>5</sub>=OCH<sub>3</sub>
16. R<sub>1</sub>=R<sub>3</sub>=R<sub>5</sub>=R<sub>7</sub>=H R<sub>2</sub>=R<sub>6</sub>=OH R<sub>4</sub>=O-rha
17. R<sub>1</sub>=R<sub>5</sub>=H R<sub>2</sub>=R<sub>6</sub>=R<sub>7</sub>=OH R<sub>3</sub>=R<sub>4</sub>=OCH<sub>3</sub>
18. R<sub>1</sub>=R<sub>3</sub>=R<sub>7</sub>=H R<sub>2</sub>=R<sub>4</sub>=R<sub>5</sub>=R<sub>6</sub>=OH

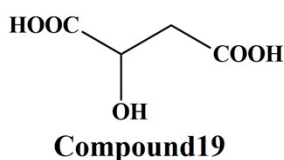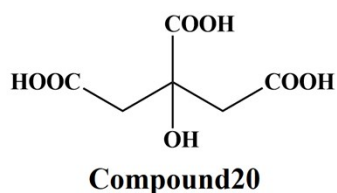

21. R<sub>1</sub>=R<sub>2</sub>=H R<sub>3</sub>=OH R<sub>4</sub>=COOH
22. R<sub>1</sub>=R<sub>3</sub>=OH R<sub>2</sub>=H R<sub>4</sub>=OH
23. R<sub>1</sub>=R<sub>2</sub>=OH R<sub>3</sub>=H R<sub>4</sub>=COOH
24. R<sub>1</sub>=R<sub>2</sub>=OH R<sub>3</sub>=H R<sub>4</sub>=CHCH<sub>2</sub>COOH
25. R<sub>1</sub>=OH R<sub>2</sub>=OCH<sub>3</sub> R<sub>3</sub>=H R<sub>4</sub>=CHCH<sub>2</sub>COOH

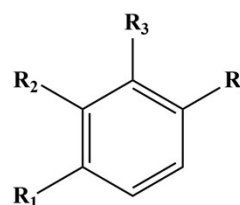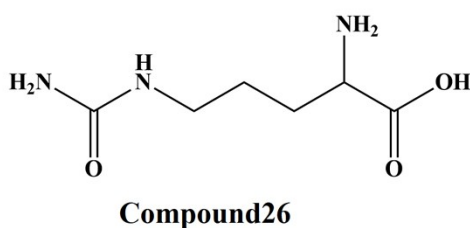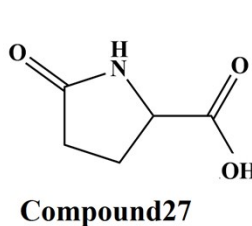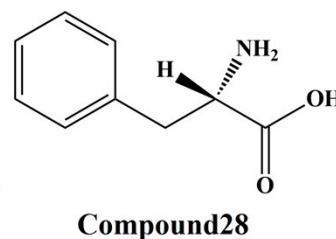

Fig. S2 Proposed fragmentation patterns pathway of quercetin-3-O-2', 6'-

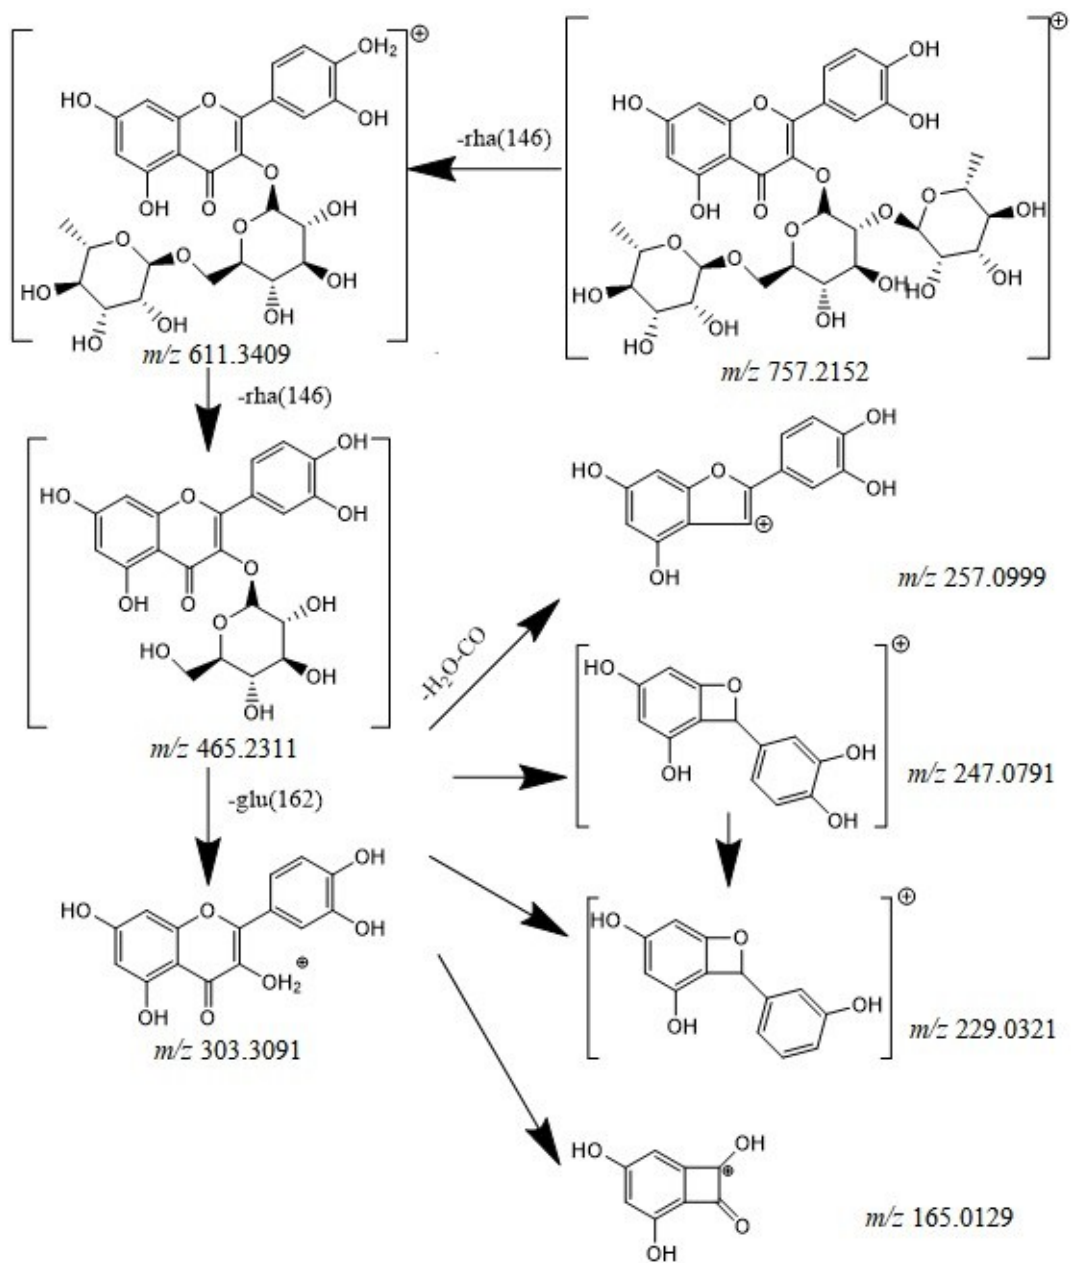

**dirhamnosylglucoside.**

**Fig. S3** The cellular viability of H<sub>2</sub>O<sub>2</sub>-induced HUVECs injury with compounds 1, 3, 4, 7, 8, 9, 11, 12, 19, 21, 23, 27 at different concentrations.

---

| No. | Survival(0.02 mg/ml) | Survival(0.2 mg/ml) | Survival(2 mg/ml) | Survival(20 mg/ml) |
|-----|----------------------|---------------------|-------------------|--------------------|
| 1   | 42.71                | 53.74               | 64.56             | 72.61              |
| 3   | 56.36                | 72.80               | 89.52             | 93.69              |
| 4   | 61.43                | 80.74               | 91.29             | 94.13              |
| 7   | 47.57                | 59.77               | 57.47             | 61.69              |
| 8   | 32.57                | 41.08               | 44.95             | 46.46              |
| 9   | 46.37                | 58.18               | 73.91             | 80.52              |
| 11  | 59.32                | 78.84               | 88.21             | 90.74              |
| 12  | 64.35                | 77.18               | 93.73             | 95.77              |
| 19  | 19.71                | 21.61               | 21.55             | 22.11              |
| 21  | 23.17                | 22.80               | 23.80             | 19.46              |
| 23  | 42.15                | 65.58               | 78.92             | 86.29              |
| 27  | 40.68                | 58.18               | 83.69             | 89.68              |

---
